# Supplementary material
Source: PubMed Central journal article supplement (PMC6646550)
Supplement: ao8b02377_si_001.pdf [file ao8b02377_si_001.pdf]

**Supporting Information for:**

**Stability of the N-terminal Helix and its Role in Amyloid Formation  
of Serum Amyloid A**

Wenhua Wang<sup>1</sup>, Wenhui Xi<sup>1</sup>, and Ulrich H.E. Hansmann<sup>1\*</sup>

<sup>1</sup>Dept. of Chemistry & Biochemistry, University of Oklahoma, 101 Stephenson Parkway, Norman, OK 73019, USA

\* corresponding author

## Contents

## Results

Figure S1. Effect on other helix on helix I.

Figure S2. Box size that minimize finite size effects.

Figure S3. Distribution of potential energies of replicas in between 300-420 K.

Figure S4. Breaking down of the straight helix after mutation E9A.

## Results

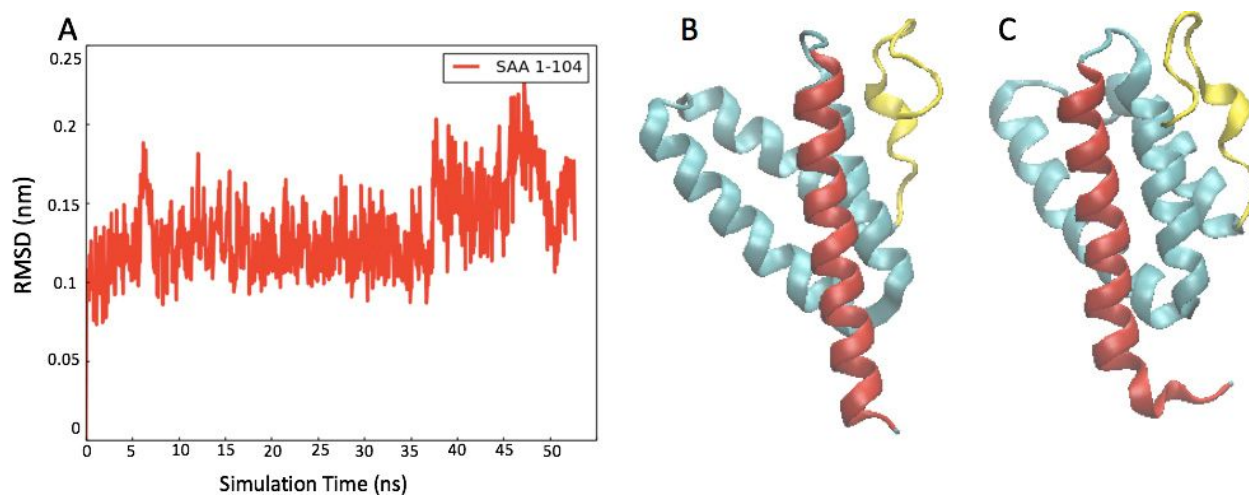

Figure S1. Root-mean-square-deviation (RMSD) to the crystal structure for the full-sized SAA protein as function of time (A). The initial configuration is shown in (B) and the final one in (C), where helix I is marked in red, helix II-IV in cyan, and the C terminal tail in yellow. Data are from a 40ns molecular dynamic simulation at 310 K, using the set-up described in the manuscript.

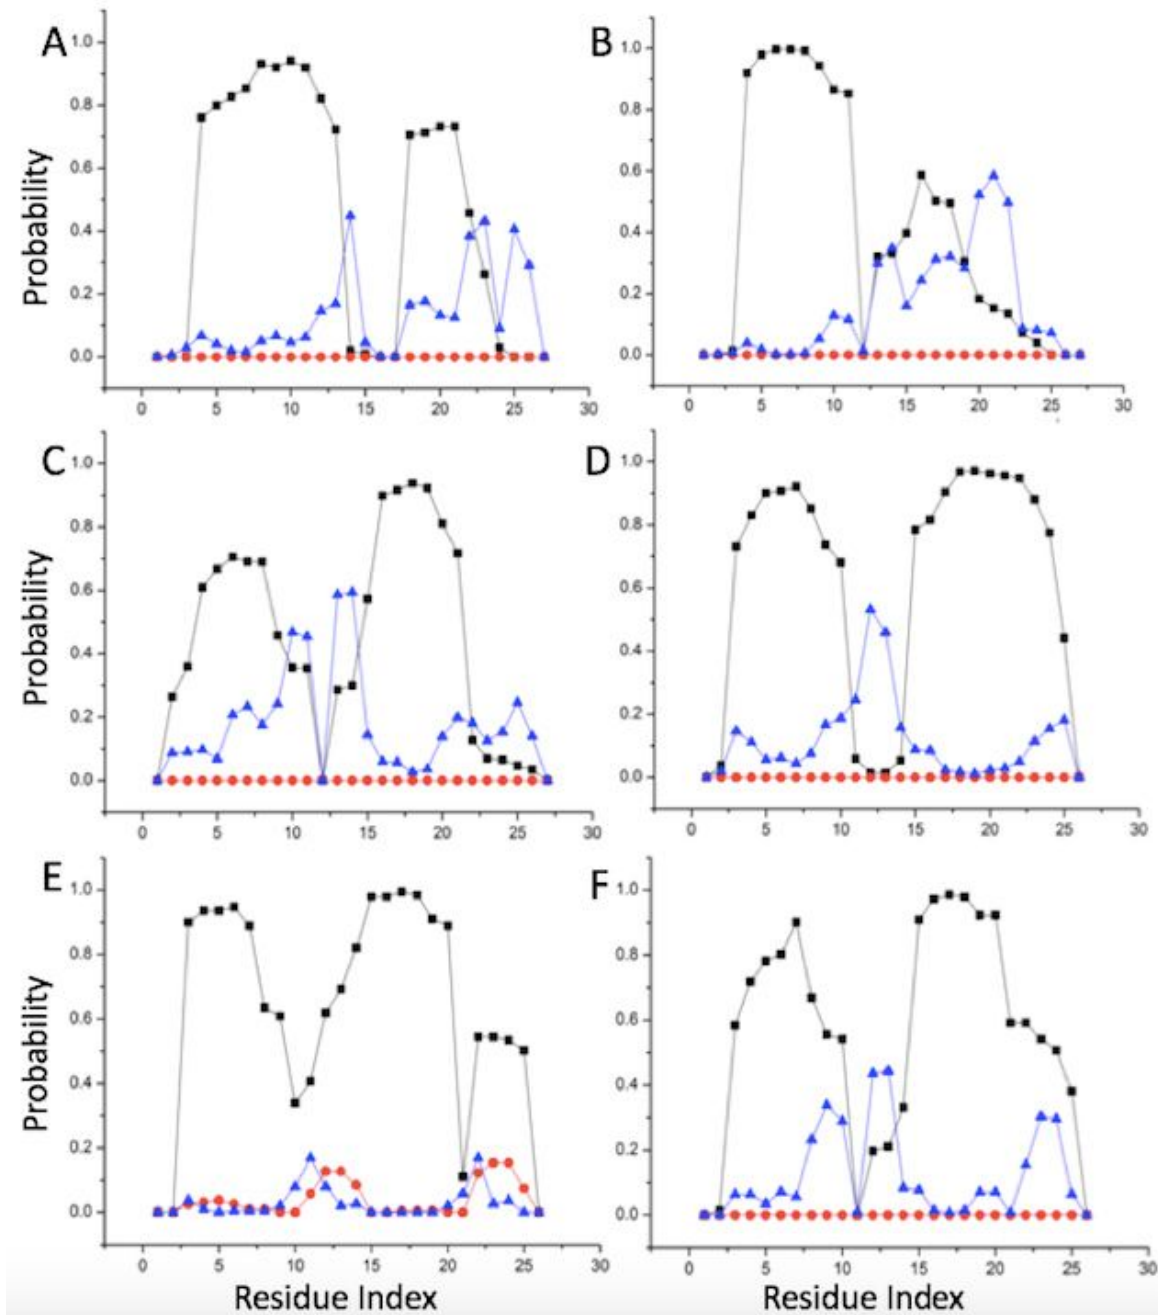

**Figure S2.** A and B, Secondary structure probability for the box size of 4.8 nm. C and D, Secondary structure probability for the box size of 5.4 nm. E and F, Secondary structure probability for the box size of 5.6 nm. The frequency of  $\alpha$ -helices is drawn in black, that of turns in blue, and of  $\beta$ -strands in red.

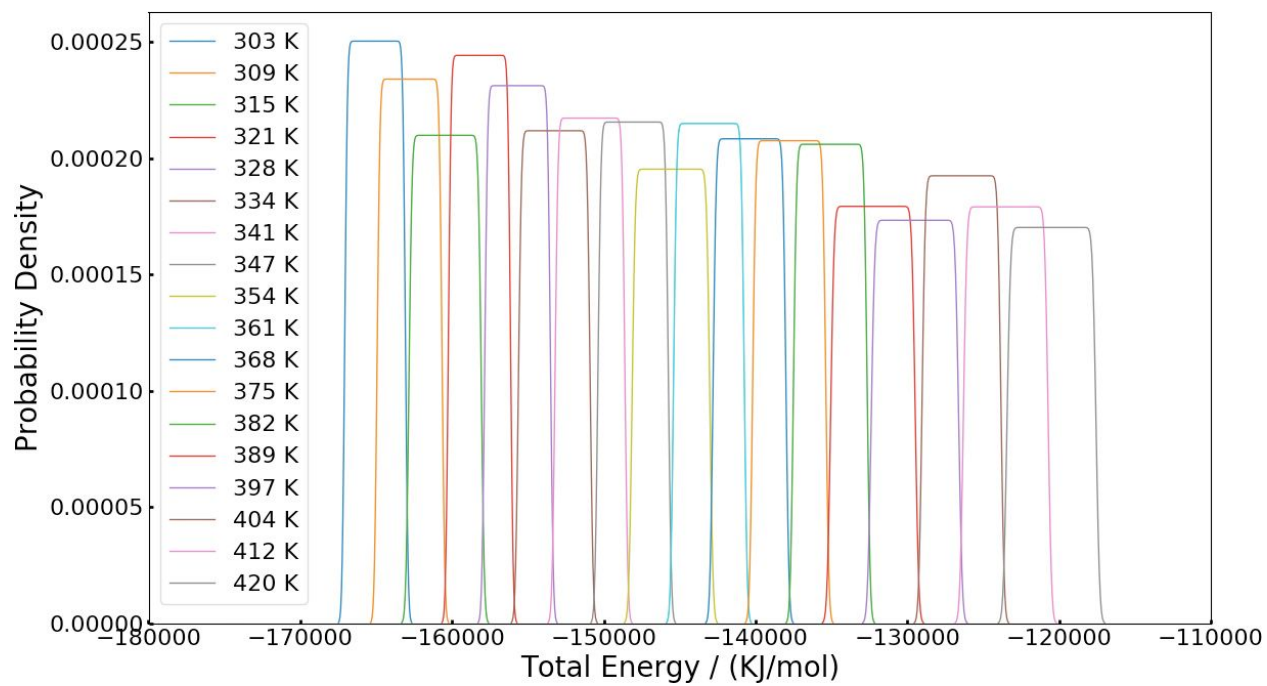

**Figure S3.** Distribution of potential energies for the 36 replicas distributed in a temperature interval between 300K and 420 K. Only every second replica is shown.

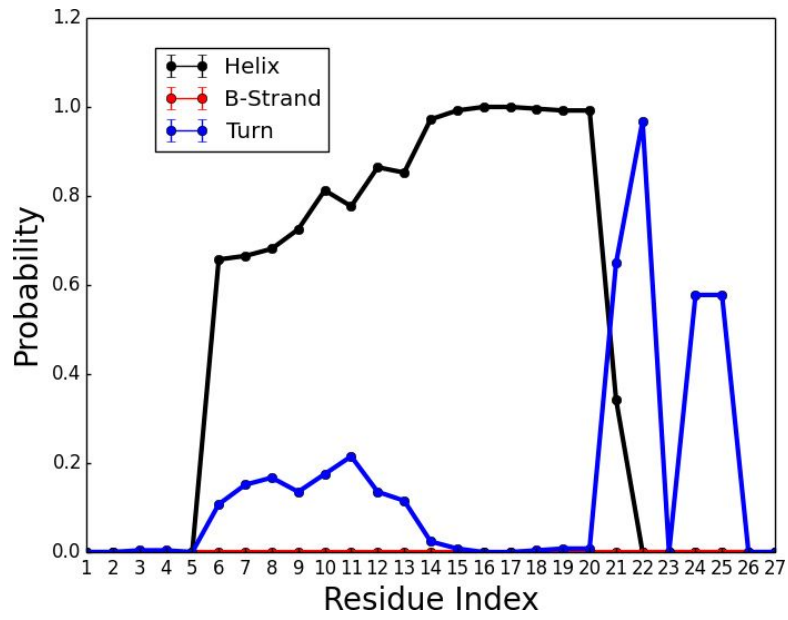

Figure S4. Secondary structure probability analysis for molecular dynamics simulation of the mutation E9A based on the straight structure from wild type.
